# Supplementary material for: Doppel and PrPC co-immunoprecipitate in detergent-resistant membrane domains of epithelial FRT cells
Source: PubMed Central journal article supplement — Biochem J. 2009 Dec 23;425(Pt 2):341–51. doi: 10.1042/BJ20091050 (PMC2825736; doi:10.1042/bj20091050), 2009-12-23
Supplement: bj4250341add.pdf [file bj4250341add.pdf]

SUPPLEMENTARY ONLINE DATA

Doppel and PrP<sup>C</sup> co-immunoprecipitate in detergent-resistant membrane domains of epithelial FRT cells

Anna CAPUTO\*<sup>†1</sup>, Daniela SARNATARO\*<sup>1</sup>, Vincenza CAMPANA<sup>†</sup>, Maddalena COSTANZO<sup>†</sup>, Alessandro NEGRO<sup>‡</sup>, M. Catia SORGATO<sup>‡</sup> and Chiara ZURZOLO\*<sup>†2</sup>

\*Dipartimento di Biologia e Patologia Cellulare e Molecolare, Università degli Studi di Napoli "Federico II", Napoli 80131, Italy, <sup>†</sup>Institut Pasteur, Unité de Trafic Membranaire et Pathogénèse, 75015 Paris, France, and <sup>‡</sup>Department of Biological Chemistry and Consiglio Nazionale delle Ricerche Institute of Neuroscience, University of Padova, Viale G. Colombo 3, 35131 Padova, Italy

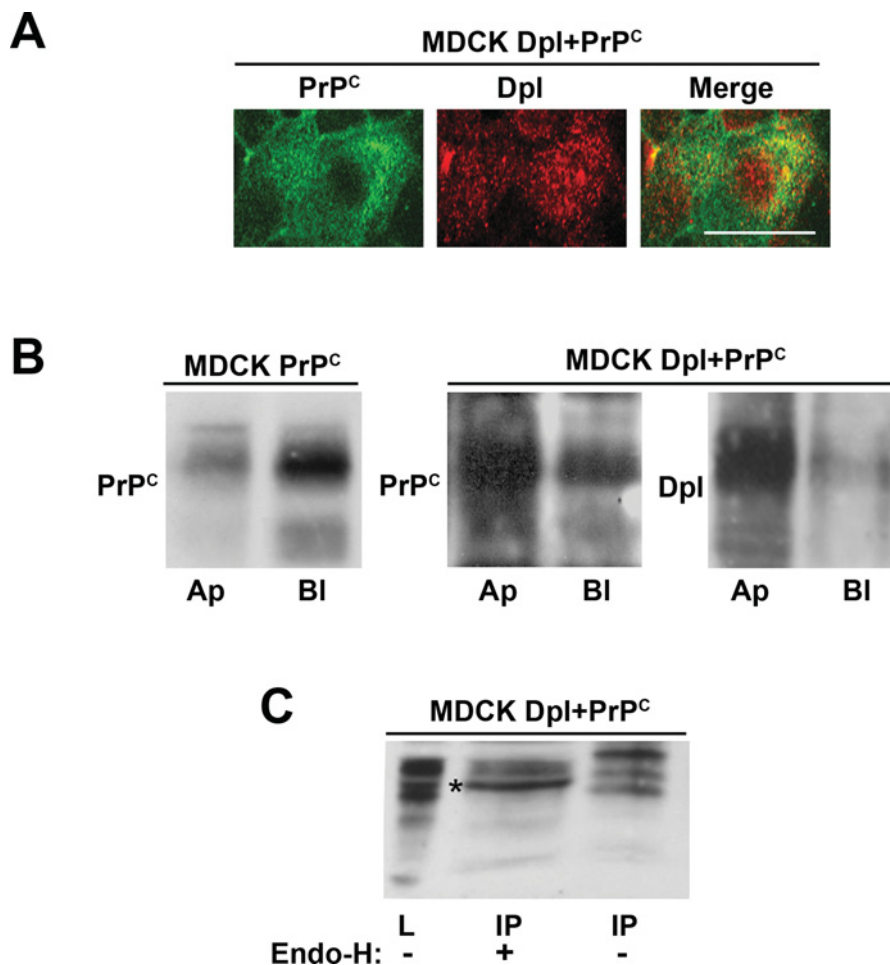

Figure S1 Co-expression of Dpl directs PrP<sup>C</sup> to the apical cell surface of polarized MDCK cells

(A) MDCK cells expressing Dpl and PrP<sup>C</sup> (MDCK Dpl + PrP<sup>C</sup>) cells were fixed with 2% (w/v) paraformaldehyde and incubated for 20 min with the monoclonal antibody SAF-32, against PrP, and the polyclonal antibody Q55, against Dpl, and secondary FITC- and TRITC-conjugated antibodies were used to reveal PrP<sup>C</sup> and Dpl respectively. Images were acquired with a Zeiss laser confocal microscope (LSCM 510). Scale bar, 10  $\mu$ m. (B) After growth on transwell filters for 4 days, singly (MDCK PrP<sup>C</sup>), or doubly (MDCK Dpl + PrP<sup>C</sup>), transfected MDCK cells were selectively biotinylated from the apical (Ap) or basolateral (Bl) surface of the plasma membrane. Biotinylated Dpl and PrP<sup>C</sup> were then recovered from cell lysates by immunoprecipitation with streptavidin beads and detected by immunoblotting with specific antibodies (Dpl 151 and SAF-32 antibodies respectively). Note that when PrP<sup>C</sup> is co-transfected with Dpl its polarity is reversed (from basolateral to apical) and it is found localized on the apical surface like Dpl. (C) Native Dpl immunoprecipitated (IP) from MDCK Dpl + PrP<sup>C</sup> cell lysates was digested with (+) and without (-) endo H (Endo-H) at 37°C for 16 h and subjected to SDS/PAGE followed by Western blot analysis with the anti-Dpl Q55 antibody. (\*) indicates the band resulting from the enzymatic digestion, indicating a partial sensitivity of Dpl to endo H. L, lysate.

<sup>1</sup> These authors contributed equally to this work

<sup>2</sup> To whom correspondence should be addressed (email zurzolo@unina.it or zurzolo@pasteur.fr).

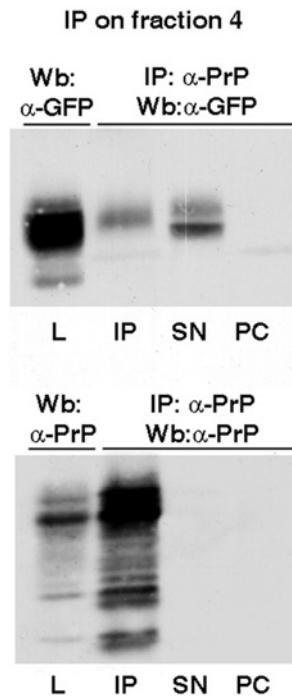

**Figure S2 Co-immunoprecipitation between GFP-Dpl and PrP<sup>C</sup> using an anti-PrP antibody in the precipitation step**

The OptiPrep™ density gradient DRM fractions (4–5) of FRT GFP–Dpl + PrP<sup>C</sup> clone lysate were first immunoprecipitated (IP) with the anti-PrP antibody and then revealed by Western blotting (Wb) with anti-GFP antibody (to reveal the co-immunoprecipitation) or anti-PrP antibody (to reveal the immunoprecipitation). The loading control (L, 60  $\mu$ g of cell lysate), the pre-clearing (PC) and 1/10 of the supernatants (SN) were also analysed.

Received 13 July 2009/3 November 2009; accepted 5 November 2009  
Published as BJ Immediate Publication 5 November 2009, doi:10.1042/BJ20091050
